# Supplementary material
Source: MDPI journal article supplement (https://www.mdpi.com/2072-4292/16/5/796)

**Figure S1.** (a) Flights carried out in the experimental and commercial areas; (b) Phenology according to days post sowing (DPS).

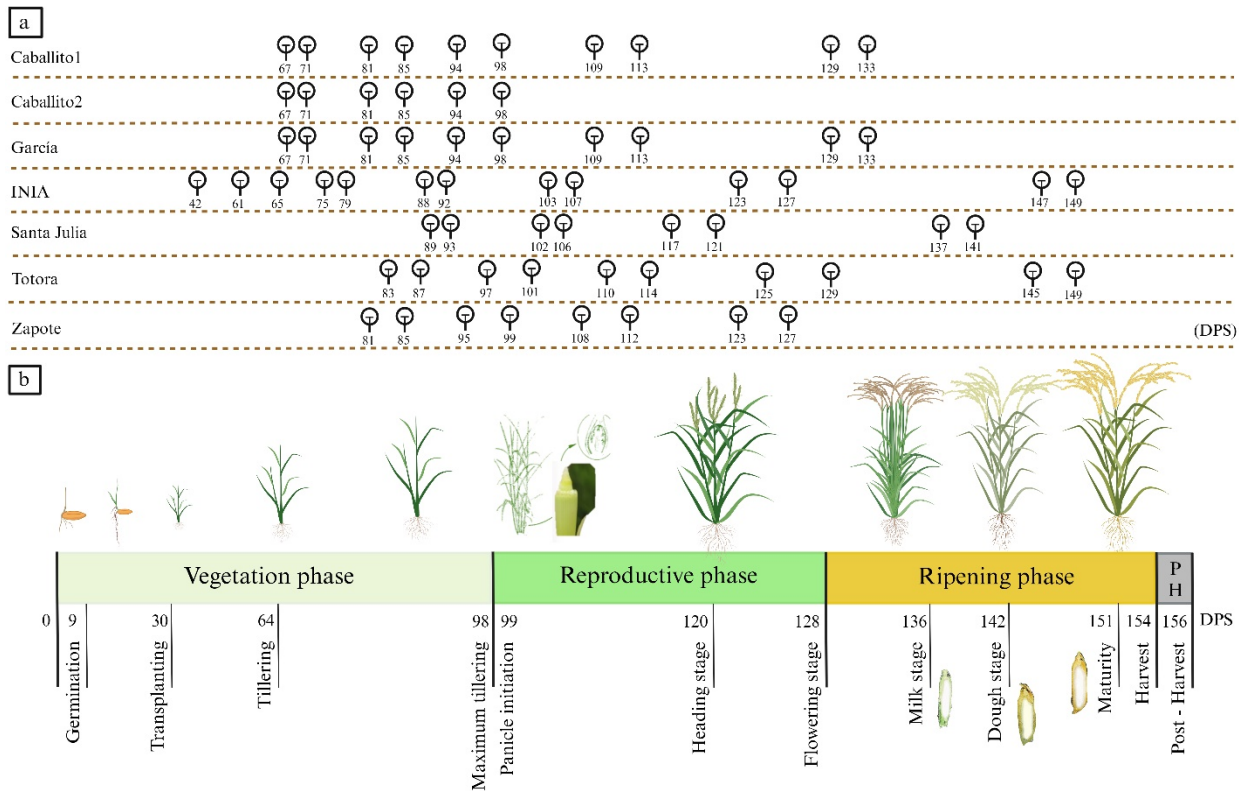

**Figure S2.** Comparison of  $R^2$  between INIA-Vista Florida and Commercial areas according to combinations by number of coverages used to collect radiometer data. The  $R^2$  was obtained from the comparison between radiometer data and thermal images.

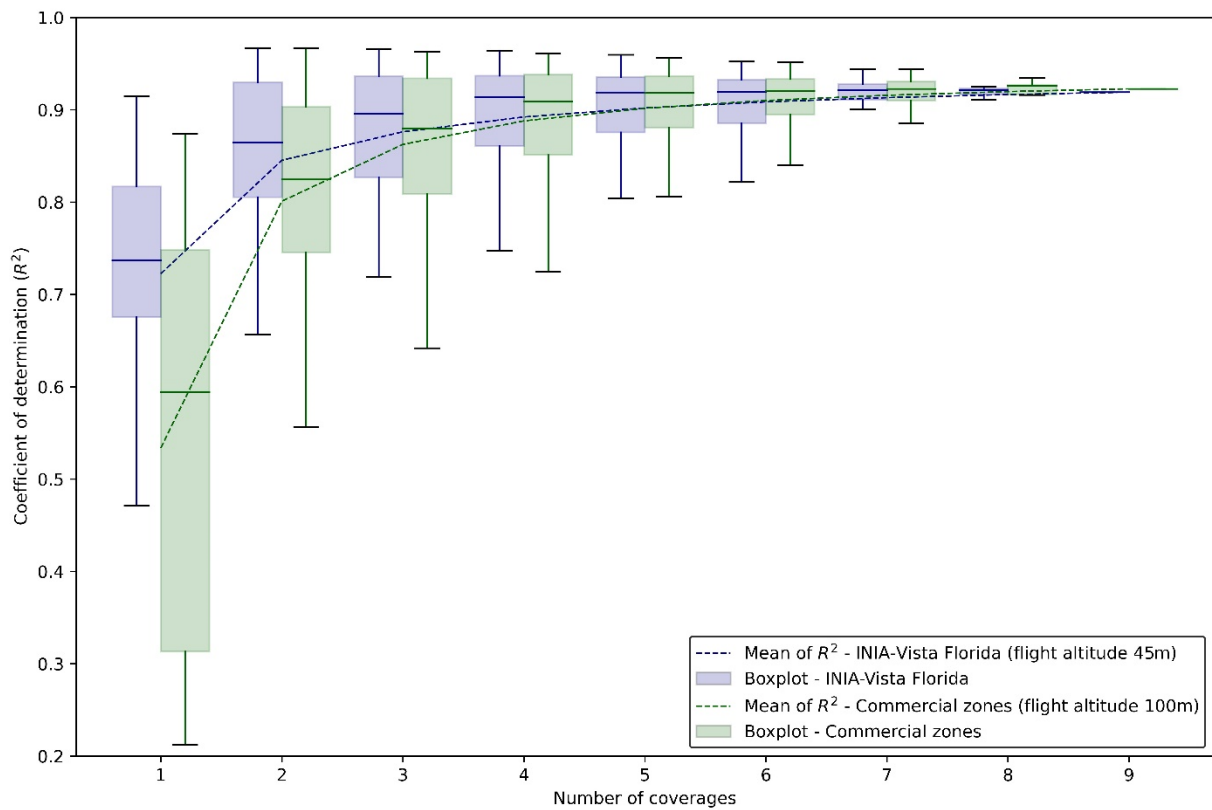

**Table S1.** Meteorological data from the portable station in INIA-Vista Florida experimental area.

| Flight | INIA-Vista Florida |        |                         |                         |
|--------|--------------------|--------|-------------------------|-------------------------|
|        | Ta (°C)            | RH (%) | WS (m s <sup>-1</sup> ) | RS (W m <sup>-2</sup> ) |
| 1      | 28.09              | 61.84  | 3.53                    | 514.63                  |
| 2      | 25.61              | 79.95  | 1.68                    | 319.44                  |
| 3      | 29.53              | 65.57  | 2.23                    | 968.17                  |
| 4      | 26.49              | 86.72  | 1.27                    | 397.75                  |
| 5      | 29.68              | 65.26  | 2.04                    | 1045.71                 |
| 6      | 28.67              | 75.99  | 0.81                    | 784.38                  |
| 7      | 26.93              | 88.40  | 1.14                    | 487.83                  |
| 8      | 27.18              | 80.66  | 0.72                    | 413.09                  |
| 9      | 26.32              | 82.10  | 1.49                    | 529.15                  |
| 10     | 27.43              | 71.38  | 2.66                    | 655.75                  |
| 11     | 27.28              | 71.19  | 2.94                    | 797.00                  |
| 12     | 27.23              | 68.08  | 1.51                    | 697.42                  |
| 13     | 27.22              | 70.96  | 2.69                    | 368.83                  |

**Table S2.** Meteorological data from portable station in commercial areas.

| Flight | Caballito and Zapote |        |                         |                         | Garcia  |        |                         |                         | Totora  |        |                         |                         | Santa Julia |        |                         |                         |
|--------|----------------------|--------|-------------------------|-------------------------|---------|--------|-------------------------|-------------------------|---------|--------|-------------------------|-------------------------|-------------|--------|-------------------------|-------------------------|
|        | Ta (°C)              | RH (%) | WS (m s <sup>-1</sup> ) | RS (W m <sup>-2</sup> ) | Ta (°C) | RH (%) | WS (m s <sup>-1</sup> ) | RS (W m <sup>-2</sup> ) | Ta (°C) | RH (%) | WS (m s <sup>-1</sup> ) | RS (W m <sup>-2</sup> ) | Ta (°C)     | RH (%) | WS (m s <sup>-1</sup> ) | RS (W m <sup>-2</sup> ) |
| 1      | 29.3                 | 69.6   | 2.5                     | 625.2                   | 29.4    | 67.4   | 2.4                     | 634.5                   | 29.3    | 67.0   | 2.3                     | 615.0                   | *           | *      | *                       | *                       |
| 2      | 27                   | 86.0   | 1.1                     | 277.5                   | 27.1    | 83.2   | 1.6                     | 290.8                   | 27.3    | 81.8   | 1.8                     | 107.5                   | *           | *      | *                       | *                       |
| 3      | 30.2                 | 66.0   | 3.1                     | 820.0                   | 29.5    | 73.0   | 2.8                     | 601.5                   | 29.4    | 67.2   | 3.6                     | 492.1                   | 28.9        | 69.7   | 2.7                     | 293.4                   |
| 4      | 29.3                 | 74.3   | 0.9                     | 432.9                   | 29.8    | 73.1   | 0.8                     | 474.7                   | 29.1    | 76.1   | 1.9                     | 357.3                   | 28.0        | 78.5   | 2.9                     | 224.9                   |
| 5      | 28.2                 | 84.7   | 1.3                     | 770.0                   | 29.2    | 80.8   | 1.2                     | 771.3                   | 29.9    | 77.6   | 1.0                     | 872.4                   | 29.5        | 77.0   | 1.1                     | 543.4                   |
| 6      | 29.6                 | 70.8   | 0.9                     | 792.5                   | 29.8    | 72.8   | 0.9                     | 568.1                   | 29.9    | 68.6   | 0.9                     | 561.9                   | 28.0        | 80.7   | 2.4                     | 195.7                   |
| 7      | 27.7                 | 80.9   | 1.4                     | 722.2                   | 29.4    | 75.9   | 1.0                     | 1045.1                  | 30.2    | 74.2   | 0.8                     | 1015.6                  | 29.2        | 77.8   | 1.4                     | 323.7                   |
| 8      | 29.6                 | 66.9   | 1.6                     | 805.5                   | 29.9    | 65.2   | 2.4                     | 750.5                   | 30.6    | 60.8   | 3.2                     | 839.4                   | 30.2        | 63.0   | 3.5                     | 699.7                   |
| 9      | 29.4                 | 66.2   | 2.3                     | 804.5                   | 29.1    | 66.5   | 2.3                     | 681.7                   | 30.3    | 60.3   | 3.0                     | 813.3                   | 29.9        | 63.5   | 2.9                     | 691.2                   |

\* There were no flights conducted using UAVs.

**Figure S3.** The levels of water stress in the Caballito 1 and Caballito 2 commercials areas are represented according to the  $G_s \text{ mmol m}^{-2} \text{ s}^{-1}$  reference scale. The water stress levels are as follows: (a) 67 DPS; (b) 71 DPS; (c) 81 DPS; (d) 85 DPS; (e) 94 DPS; (f) 98 DPS; (g) 109 DPS; (h) 113 DPS; (i) 129 DPS; y (j) 133 DPS.

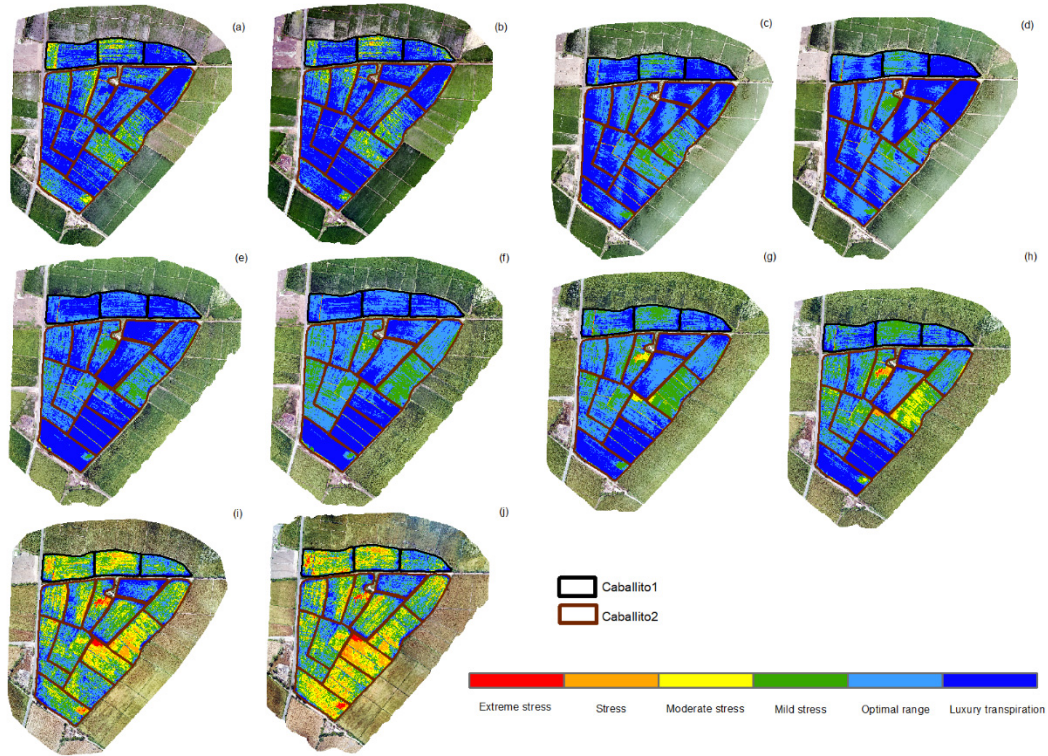

**Figure S4.** The levels of water stress in the García commercial area are represented according to the  $G_s \text{ mmol m}^{-2} \text{ s}^{-1}$  reference scale. The water stress levels are as follows: (a) 67 DPS; (b) 71 DPS; (c) 81 DPS; (d) 85 DPS; (e) 94 DPS; (f) 98 DPS; (g) 109 DPS; (h) 113 DPS; (i) 129 DPS; y (j) 133 DPS.



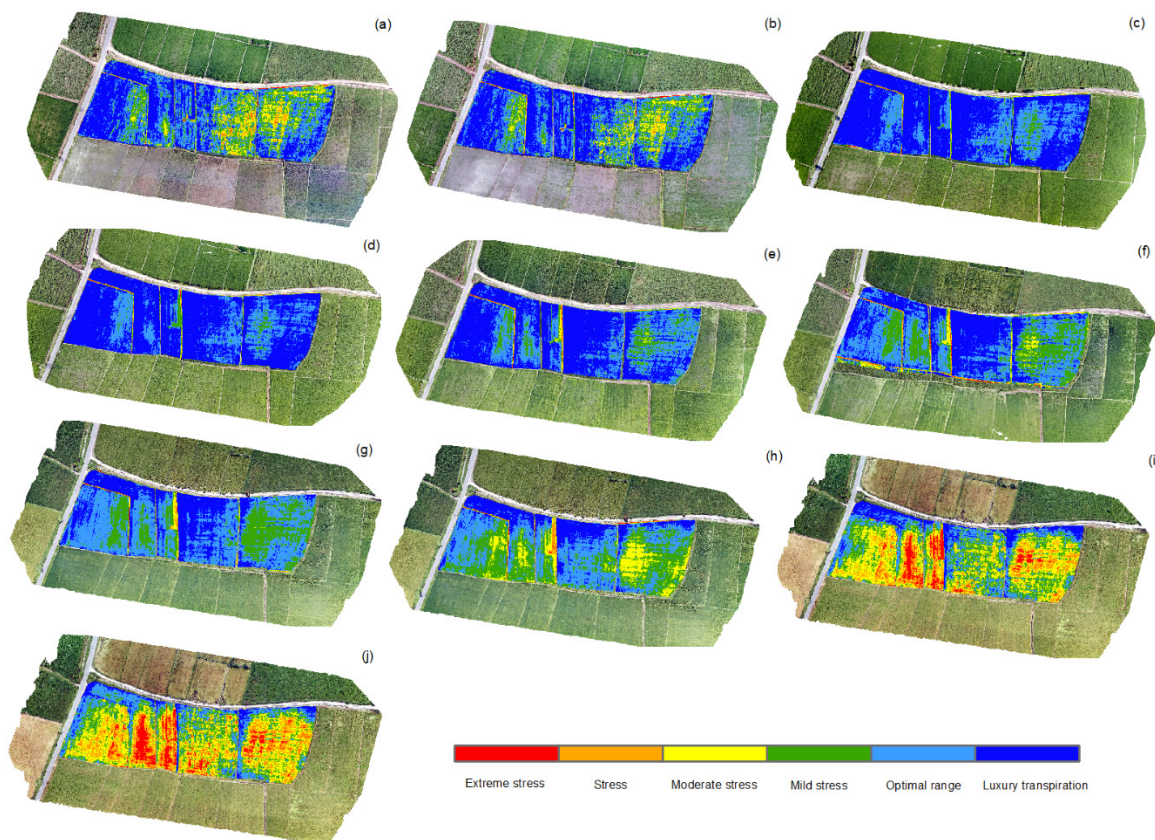

**Figure S5.** The levels of water stress in the Totora commercial area are represented according to the  $G_s$   $\text{mmol m}^{-2}\text{s}^{-1}$  reference scale. The water stress levels are as follows: (a) 83 DPS; (b) 87 DPS; (c) 97 DPS; (d) 101 DPS; (e) 110 DPS; (f) 114 DPS; (g) 125 DPS; (h) 129 DPS; (i) 145 DPS; y (j) 149 DPS.

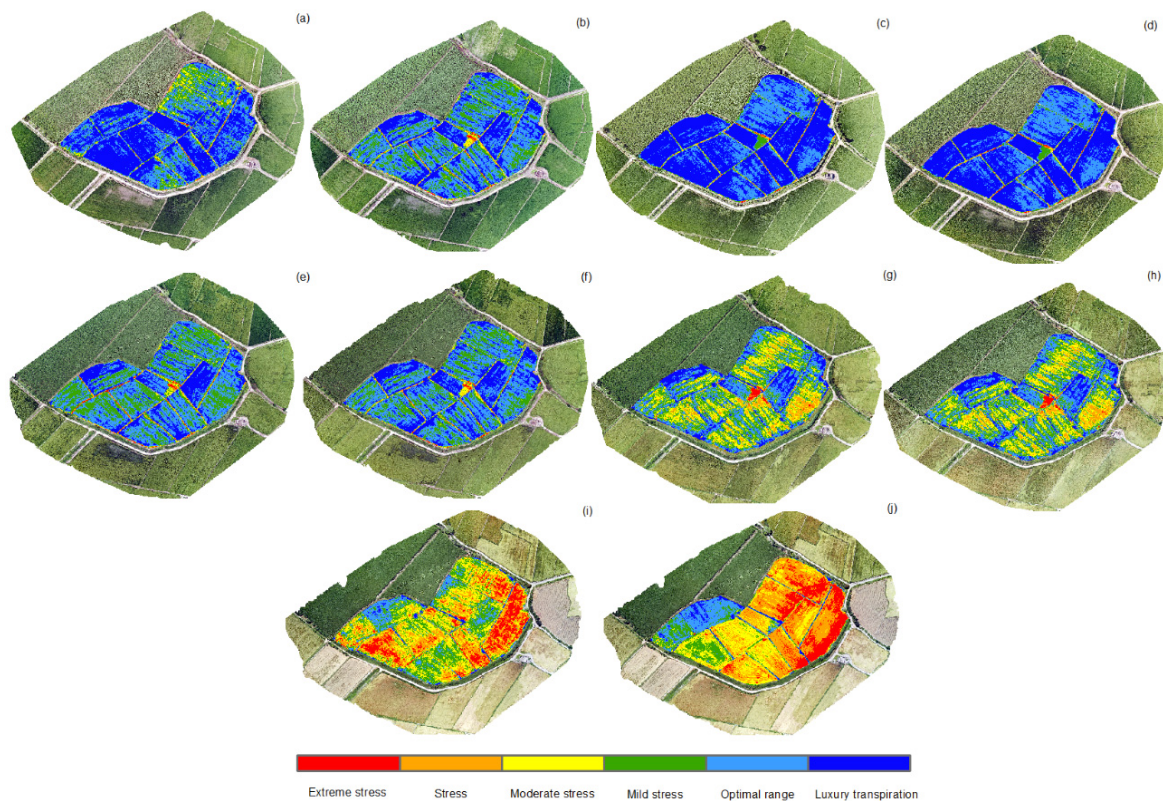

**Figure S6.** The levels of water stress in the Zapote commercial area are represented according to the  $G_s \text{ mmol m}^{-2} \text{ s}^{-1}$  reference scale. The water stress levels are as follows: (a) 81 DPS; (b) 85 DPS; (c) 95 DPS; (d) 99 DPS; (e) 108 DPS; (f) 112 DPS; (g) 123 DPS; y (h) 127 DPS.

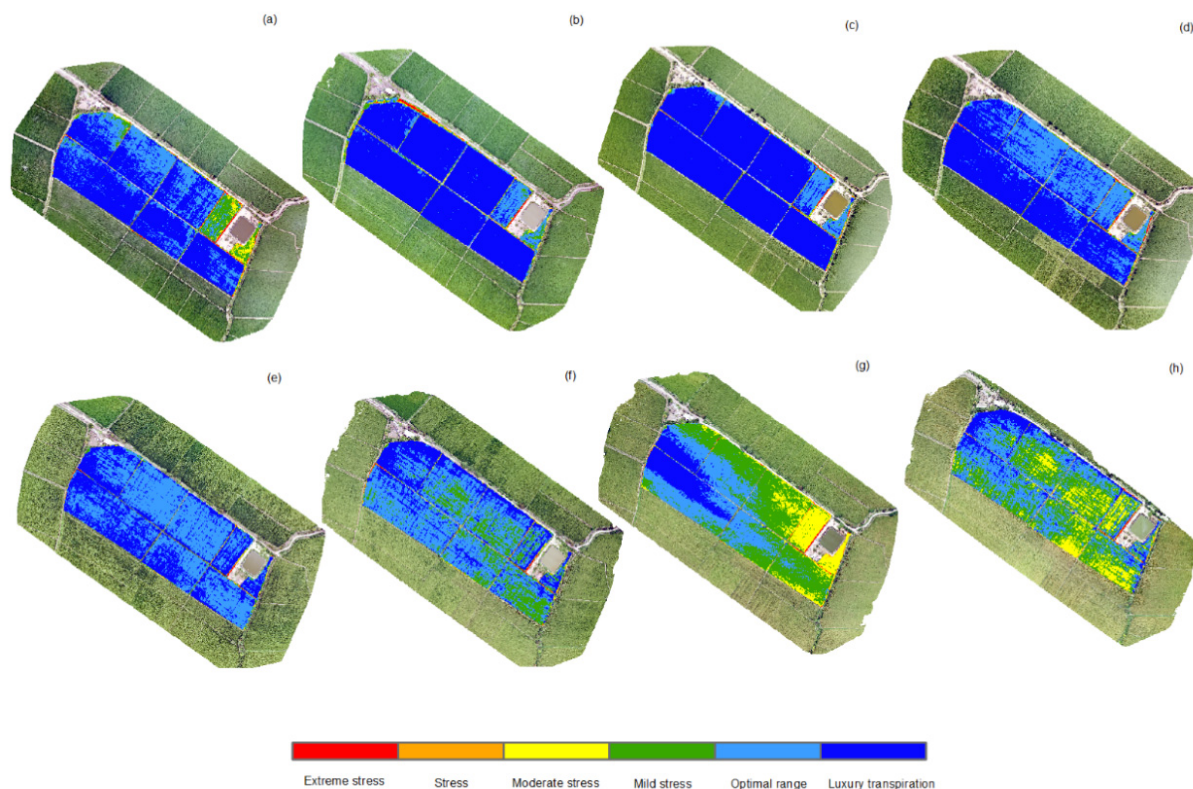

Supplement: s1 [file s1]
